# Supplementary material for: Probability of phenotypically detectable protein damage by ENU-induced mutations in the Mutagenetix database
Source: PubMed Central journal article supplement (PMC5789985; doi:10.1038/s41467-017-02806-4), 2018-01-30
Supplement: 41467_2017_2806_MOESM2_ESM.pdf [file 41467_2017_2806_MOESM2_ESM.pdf]

## **Description of Additional Supplementary Files**

File Name: Supplementary Data 1

Description: Predicted effects of putative null mutations in 38 non-essential genes.
